# Supplementary material for: Bilingual Spatial Cognition: Spatial Cue Use in Bilinguals and Monolinguals
Source: MDPI journal article supplement (doi:10.3390/brainsci14020134), 2024-01-27
Supplement: s1 [file s1]

**Table S1.** Reaction times on the Flanker Task per group and condition

|                     | Mean   | SD    |
|---------------------|--------|-------|
| <i>Bilinguals</i>   |        |       |
| Incongruent         | 457.54 | 42.88 |
| Congruent           | 407.92 | 46.38 |
| Neutral             | 408.86 | 45.26 |
| <i>Monolinguals</i> |        |       |
| Incongruent         | 545.66 | 73.92 |
| Congruent           | 479.41 | 60.55 |
| Neutral             | 475.04 | 61.18 |

**Table S2. ENCODING.** Brain regions showing significantly more activity for bilinguals than monolinguals (statistical threshold at  $p < .001$  uncorrected).

threshold at p<0.001 uncorrected).

| Region                                        | BA | Cluster<br>Extent<br>(voxels) | Peak Voxel Level |         | MNI coordinates |     |     |
|-----------------------------------------------|----|-------------------------------|------------------|---------|-----------------|-----|-----|
|                                               |    |                               | T                | equiv Z | x               | y   | z   |
| EFFECT OF GROUP                               |    |                               |                  |         |                 |     |     |
| Bilinguals > Monolinguals                     |    |                               |                  |         |                 |     |     |
| Right middle temporal gyrus                   | 21 | 6919                          | 6.28             | 5.35    | 46              | -54 | 10  |
| Right fusiform gyrus                          | 18 |                               | 6.18             | 5.29    | 24              | -72 | -14 |
| Left fusiform gyrus                           | 19 |                               | 5.95             | 5.14    | -28             | -68 | -6  |
| Right inferior frontal gyrus (p. opercularis) | 44 | 1150                          | 5.46             | 4.80    | 58              | 14  | 30  |
| Right cerebral white matter                   | 48 |                               | 5.26             | 4.66    | 40              | 2   | 22  |
| Right precentral gyrus                        | 6  |                               | 4.87             | 4.38    | 58              | 6   | 38  |
| Left inferior temporal gyrus                  | 20 | 1084                          | 5.40             | 4.76    | -46             | 0   | -38 |
| Left inferior frontal gyrus (p. orbitalis)    | 38 |                               | 5.11             | 4.55    | -26             | 18  | -24 |
| Left temporal pole                            | 38 |                               | 5.06             | 4.52    | -46             | 18  | -22 |
| Left supplementary motor area                 | 8  | 814                           | 5.31             | 4.69    | -8              | 26  | 50  |
| Right supplementary motor area                | 8  |                               | 4.76             | 4.30    | 10              | 26  | 56  |
| Left superior medial frontal gyrus            | 32 |                               | 4.24             | 3.90    | -8              | 38  | 38  |
| Left inferior parietal cortex                 | 39 | 726                           | 5.48             | 4.82    | -48             | -58 | 44  |
| Left supramarginal gyrus                      | 40 |                               | 4.41             | 4.03    | -58             | -46 | 36  |
| Left angular gyrus                            | 39 |                               | 4.24             | 3.89    | -44             | -66 | 50  |
| Left postcentral gyrus                        | 4  | 324                           | 5.05             | 4.51    | -58             | -2  | 40  |
| Left precentral gyrus                         | 4  |                               | 4.74             | 4.28    | -60             | 0   | 32  |
| Left inferior frontal gyrus (p. triangularis) | 44 |                               | 4.65             | 4.21    | -58             | 14  | 30  |
| Left cerebral white matter                    | 21 | 384                           | 4.72             | 4.27    | -46             | -28 | -2  |
| Left middle temporal gyrus                    | 21 |                               | 4.17             | 3.84    | -54             | -34 | -4  |
| Left cerebral white matter                    | -  |                               | 3.46             | 3.25    | -40             | -42 | 6   |
| Right superior frontal gyrus                  | 9  | 314                           | 6.25             | 5.33    | 14              | 60  | 36  |
| Right superior frontal gyrus                  | 9  |                               | 4.12             | 3.82    | 18              | 46  | 48  |
| Right middle frontal gyrus                    | -  |                               | 3.59             | 3.37    | 28              | 60  | 28  |
| Right cerebral white matter                   | 2  | 261                           | 4.25             | 3.91    | 46              | -30 | 36  |
| Right supramarginal gyrus                     | 2  |                               | 4.24             | 3.90    | 58              | -32 | 34  |
| Right supramarginal gyrus                     | 48 |                               | 4.16             | 3.89    | 42              | -30 | 26  |

|                                               |    |      |      |      |     |     |     |
|-----------------------------------------------|----|------|------|------|-----|-----|-----|
| Left supramarginal gyrus                      | 2  | 198  | 4.69 | 4.24 | -52 | -28 | 36  |
| Left supramarginal gyrus                      | 2  |      | 4.14 | 3.82 | -60 | -24 | 40  |
| Left cerebral white matter                    | 48 |      | 3.96 | 3.67 | -42 | -30 | 34  |
| <b>OBJECTS TRIALS</b>                         |    |      |      |      |     |     |     |
| <b>Bilinguals &gt; Monolinguals</b>           |    |      |      |      |     |     |     |
| Left inferior parietal cortex                 | 40 | 531  | 4.63 | 4.20 | -48 | -54 | 42  |
| Left inferior parietal cortex                 | 40 |      | 3.76 | 3.51 | -58 | -46 | 36  |
| Left inferior parietal cortex                 | 40 |      | 3.74 | 3.49 | -52 | -46 | 42  |
| Right angular gyrus                           | 39 | 498  | 4.64 | 4.20 | 50  | -66 | 42  |
| Right middle occipital gyrus                  | 39 |      | 4.29 | 3.93 | 38  | -72 | 28  |
| Right cerebral white matter                   | 19 |      | 3.99 | 3.70 | 28  | -64 | 22  |
| Right middle temporal gyrus                   | 21 | 397  | 5.35 | 4.72 | 46  | -54 | 10  |
| Right middle temporal gyrus                   | 21 |      | 4.06 | 3.75 | 52  | -46 | 4   |
| Right middle temporal gyrus                   | 37 |      | 3.73 | 3.49 | 58  | -64 | 14  |
| Right fusiform gyrus                          | 18 | 239  | 4.41 | 4.03 | 24  | -72 | -14 |
| Right cerebellum                              | 18 |      | 4.14 | 3.82 | 16  | -74 | -16 |
| Right fusiform gyrus                          | 19 |      | 3.68 | 3.44 | 26  | -72 | -6  |
| Left inferior temporal gyrus                  | 20 | 202  | 4.70 | 4.25 | -46 | 0   | -38 |
| Left cerebral white matter                    | 20 |      | 3.47 | 3.27 | -40 | -6  | -24 |
| Left temporal pole                            | 38 |      | 3.44 | 3.24 | -34 | 10  | -24 |
| <b>SHADOW TRIALS</b>                          |    |      |      |      |     |     |     |
| <b>Bilinguals &gt; Monolinguals</b>           |    |      |      |      |     |     |     |
| Right lingual gyrus                           | 18 | 1364 | 5.29 | 4.68 | 8   | -74 | -8  |
| Left fusiform gyrus                           | 19 |      | 5.29 | 4.68 | -28 | -72 | -8  |
| Right fusiform gyrus                          | 18 |      | 5.27 | 4.66 | 24  | -72 | -14 |
| Right calcarine gyrus                         | 17 | 491  | 4.41 | 4.03 | 18  | -58 | 10  |
| Right calcarine gyrus                         | 17 |      | 4.18 | 3.85 | 8   | -64 | 12  |
| Right cuneus                                  | 18 |      | 4.16 | 3.83 | 10  | -82 | 18  |
| Right cerebral white matter                   | 19 | 409  | 4.57 | 4.15 | 36  | -72 | 2   |
| Right middle occipital gyrus                  | 19 |      | 4.40 | 4.02 | 44  | -82 | 10  |
| Right middle occipital gyrus                  | 39 |      | 4.34 | 3.97 | 38  | -72 | 28  |
| Left inferior frontal gyrus, (p. orbitalis)   | 38 | 407  | 5.23 | 4.64 | -26 | 18  | -24 |
| Left inferior frontal gyrus, (p. orbitalis)   | 11 |      | 4.50 | 4.10 | -20 | 12  | -18 |
| Left cerebral white matter                    | 48 |      | 3.92 | 3.64 | -38 | 6   | -16 |
| Right precentral gyrus                        | 6  | 286  | 4.44 | 4.05 | 58  | 6   | 36  |
| Right inferior frontal gyrus (p. opercularis) | 44 |      | 4.14 | 3.82 | 58  | 14  | 28  |
| Right precentral gyrus                        | 6  |      | 3.63 | 3.40 | 50  | 8   | 48  |

**Table S3. RETRIEVAL – CONGRUENT.** Brain regions showing significantly more activity for bilinguals than monolinguals (statistical threshold at  $p < .001$  uncorrected).

| Region | BA | Cluster Extent (voxels) | Peak Voxel Level |         | MNI coordinates |   |   |
|--------|----|-------------------------|------------------|---------|-----------------|---|---|
|        |    |                         | T                | equiv Z | x               | y | z |

| <b>EFFECT OF GROUP</b>              |    |     |      |      |     |     |     |
|-------------------------------------|----|-----|------|------|-----|-----|-----|
| <b>Bilinguals &gt; Monolinguals</b> |    |     |      |      |     |     |     |
| Right superior frontal gyrus        | 10 | 508 | 6.15 | 5.27 | 16  | 62  | 24  |
| Right middle frontal gyrus          | 46 |     | 5.38 | 4.75 | 26  | 62  | 26  |
| Right superior medial frontal gyrus | 9  |     | 4.82 | 4.34 | 10  | 60  | 38  |
| Right cerebellum                    | 30 | 390 | 6.21 | 5.31 | 24  | -32 | -24 |
| Right fusiform gyrus                | 37 |     | 5.26 | 4.66 | 32  | -34 | -14 |
| Right cerebral white matter         | -  |     | 4.47 | 4.07 | 24  | -18 | -30 |
| Left caudate nucleus                | -  | 388 | 5.74 | 5.00 | -6  | 16  | 10  |
| Left superior orbitalfrontal gyrus  | 11 |     | 5.14 | 4.58 | -22 | 20  | -12 |
| Left cerebral white matter          | 11 |     | 4.60 | 4.17 | -18 | 24  | -6  |
| Right superior orbitalfrontal gyrus | 11 | 339 | 7.13 | 5.88 | 16  | 56  | -10 |
| Right superior frontal gyrus        | 10 |     | 4.70 | 4.25 | 18  | 60  | 4   |
| Right rectus                        | 11 |     | 4.59 | 4.16 | 6   | 52  | -18 |
| Right rolandic operculum            | 48 | 289 | 6.87 | 5.72 | 54  | -18 | 22  |
| Right superior temporal gyrus       | 22 |     | 3.77 | 3.52 | 66  | -12 | 12  |
| Left superior temporal gyrus        | 48 | 267 | 6.54 | 5.52 | -48 | 6   | -12 |
| Left superior temporal pole         | 38 |     | 4.90 | 4.40 | -44 | 26  | -18 |
| Left cerebral white matter          | -  |     | 4.77 | 4.30 | -42 | 36  | -20 |
| Left parahippocampal gyrus*         | 37 | 101 | 5.26 | 4.66 | 32  | -34 | -14 |
|                                     |    |     | 4.64 | 4.20 | 26  | -28 | -20 |
|                                     |    |     | 4.53 | 4.12 | 24  | -26 | -24 |
|                                     |    |     | 4.47 | 4.07 | 24  | -18 | -30 |
|                                     |    |     | 4.27 | 3.92 | 26  | -22 | -28 |
|                                     |    |     | 3.91 | 3.63 | 26  | -30 | -16 |
| Right parahippocampal gyrus*        | 36 | 77  | 6.14 | 5.26 | -22 | -16 | -32 |
|                                     |    |     | 4.26 | 3.91 | -22 | -24 | -26 |
| Right hippocampus*                  | 20 | 53  | 4.36 | 3.99 | 26  | -14 | -12 |
|                                     |    |     | 3.57 | 3.35 | 40  | -12 | -14 |
| <b>OBJECTS TRIALS</b>               |    |     |      |      |     |     |     |
| <b>Bilinguals &gt; Monolinguals</b> |    |     |      |      |     |     |     |
| Left caudate nucleus*               | -  | 25  | 4.36 | 3.99 | -6  | 16  | 8   |
| <b>SHADOW TRIALS</b>                |    |     |      |      |     |     |     |
| <b>Bilinguals &gt; Monolinguals</b> |    |     |      |      |     |     |     |
| Right superior frontal gyrus        | 10 | 267 | 5.18 | 4.60 | 16  | 62  | 24  |
| Right middle frontal gyrus          | 46 |     | 4.45 | 4.06 | 26  | 62  | 26  |
| Right superior medial frontal gyrus | 9  |     | 3.90 | 3.62 | 10  | 60  | 38  |
| Left caudate nucleus*               | -  | 20  | 4.07 | 3.76 | -6  | -16 | 8   |
|                                     |    | 19  | 3.66 | 3.43 | -16 | 24  | -6  |
|                                     |    |     | 3.58 | 3.36 | -10 | 22  | -6  |
| Left parahippocampal gyrus*         | 36 | 35  | 4.97 | 4.45 | -22 | -16 | -32 |

\*p < .05 SVC

**Table S4. RETREIVAL – INCONGRUENT.** Brain regions showing significantly more activity for bilinguals than monolinguals (statistical threshold at p<.001 uncorrected).

| Region | BA | Cluster Extent (voxels) | Peak Voxel Level | MNI coordinates |
|--------|----|-------------------------|------------------|-----------------|
|--------|----|-------------------------|------------------|-----------------|

|                                                |    |      | T    | equiv Z | x   | y   | z   |
|------------------------------------------------|----|------|------|---------|-----|-----|-----|
| <b>EFFECT OF GROUP</b>                         |    |      |      |         |     |     |     |
| <b>Bilinguals &gt; Monolinguals</b>            |    |      |      |         |     |     |     |
| Right superior frontal gyrus                   | 10 | 2339 | 6.93 | 5.76    | 18  | 58  | 18  |
| Right inferior frontal gyrus (p. triangularis) | 45 |      | 6.49 | 5.49    | 56  | 34  | 2   |
| Right superior medial frontal gyrus            | 9  |      | 6.10 | 5.23    | 10  | 60  | 38  |
| Right inferior temporal gyrus                  | 20 | 1159 | 5.61 | 4.90    | 44  | -12 | -28 |
| Right cerebral white matter                    | -  |      | 5.21 | 4.62    | 22  | -14 | -10 |
| Right parahippocampal gyrus                    | 37 |      | 5.14 | 4.57    | 34  | -34 | -14 |
| Left cerebral white matter                     | -  | 726  | 5.63 | 4.92    | -6  | -12 | 30  |
| Right superior frontal gyrus                   | 6  |      | 5.46 | 4.80    | 14  | 14  | 54  |
| Right cerebral white matter                    | -  |      | 4.44 | 4.05    | 6   | 8   | 28  |
| Left caudate nucleus                           | 25 | 461  | 5.10 | 4.54    | -6  | 16  | 8   |
| Right cerebral white matter                    | 25 |      | 4.38 | 4.00    | 4   | 30  | 4   |
| Left anterior cingulate cortex                 | 11 |      | 4.14 | 3.81    | -4  | 40  | 4   |
| Right rolandic operculum                       | 48 | 331  | 6.96 | 5.78    | 52  | -18 | 24  |
| Right supramarginal gyrus                      | 48 |      | 4.40 | 4.02    | 60  | -26 | 28  |
| Right supramarginal gyrus                      | 2  |      | 4.36 | 3.99    | 62  | -24 | 36  |
| Left cerebral white matter                     | 48 | 248  | 4.62 | 4.19    | -24 | 20  | -12 |
| Left inferior orbital frontal gyrus            | 47 |      | 4.40 | 4.02    | -34 | 26  | -14 |
| Left superior temporal pole                    | 38 |      | 4.07 | 3.76    | -44 | 26  | -18 |
| Right hippocampus*                             | -  | 105  | 4.47 | 4.08    | 24  | -14 | -12 |
|                                                |    |      | 4.23 | 3.89    | 40  | -12 | -24 |
|                                                |    |      | 3.56 | 3.34    | 42  | -16 | -18 |
|                                                |    |      | 3.49 | 3.28    | 30  | -12 | -26 |
|                                                |    |      | 3.47 | 3.27    | 40  | -22 | -18 |
| <b>OBJECTS INCONGRUENT TRIALS</b>              |    |      |      |         |     |     |     |
| <b>Bilinguals &gt; Monolinguals</b>            |    |      |      |         |     |     |     |
| Right superior frontal gyrus                   | 10 | 273  | 4.92 | 4.42    | 18  | 58  | 18  |
| Right superior medial frontal gyrus            | 9  |      | 4.17 | 3.84    | 10  | 60  | 38  |
| Right cerebral white matter                    | -  |      | 3.76 | 3.50    | 20  | 46  | 22  |
| Left caudate nucleus*                          | -  | 26   | 4.13 | 3.80    | -6  | 16  | 8   |
|                                                |    |      | 3.63 | 3.40    | -4  | 18  | 2   |
| <b>SHADOW INCONGRUENT TRIALS</b>               |    |      |      |         |     |     |     |
| <b>Bilinguals &gt; Monolinguals</b>            |    |      |      |         |     |     |     |
| Right superior frontal gyrus                   | 10 | 1221 | 5.83 | 5.05    | 18  | 58  | 18  |
| Right superior medial frontal gyrus            | 10 |      | 5.50 | 4.83    | 14  | 60  | 2   |
| Right superior medial frontal gyrus            | 9  |      | 5.29 | 4.69    | 10  | 60  | 38  |
| Right inferior temporal gyrus                  | 20 | 263  | 4.76 | 4.30    | 44  | -12 | -30 |
| Right inferior temporal gyrus                  | 20 |      | 3.92 | 3.64    | 50  | -6  | -36 |
| Right cerebral white matter                    | 36 |      | 3.48 | 3.28    | 34  | 4   | -30 |

|                             |   |    |      |      |     |     |     |
|-----------------------------|---|----|------|------|-----|-----|-----|
| Right hippocampus*          | - | 44 | 4.54 | 4.13 | 24  | -14 | -12 |
| Left caudate nucleus*       | - | 21 | 3.78 | 3.52 | -6  | 16  | 8   |
|                             |   |    | 3.70 | 3.45 | -4  | 20  | 0   |
| Left parahippocampal gyrus* | - | 55 | 4.58 | 4.16 | -24 | -18 | -30 |

\*p < .05 SVC
